# Supplementary material for: Development and Validation of an Artificial Intelligence–Powered Platform for Prostate Cancer Grading and Quantification
Source: PubMed Central journal article supplement — JAMA Netw Open. 2021 Nov 3;4(11):e2132554. doi: 10.1001/jamanetworkopen.2021.32554 (PMC8567112; doi:10.1001/jamanetworkopen.2021.32554), 2021-11-03
Supplement: jamanetwopen-e2132554-s001.pdf [file jamanetwopen-e2132554-s001.pdf]

## Supplementary Online Content

Huang W, Randhawa R, Jain P, et al. Development and validation of an artificial intelligence–powered platform for prostate cancer grading and quantification. *JAMA Netw Open*. 2021;4(11):e2132554. doi:10.1001/jamanetworkopen.2021.32554

**eTable 1.** Summaries of Biopsy Cohorts

**eTable 2.** Cross Tabulation: AI vs Training Pathologist Grading Using AI-Assisted Method

**eTable 3.** Cross Tabulation: Degree of Consensus Grading Using Manual and AI-Assisted Methods

**eFigure.** Model Architecture of AI-Powered Platform

This supplementary material has been provided by the authors to give readers additional information about their work.

**eTable 1.** Summaries of Biopsy Cohorts

| Cohort (n)       | Dx  | GGG (Case #) | Age at Biopsy (yrs., mean) | Pre-Biopsy PSA (ng/mL, mean) | Pos. Cores (n, mean) | Total Cores (n, mean) | TCV (% , mean) |
|------------------|-----|--------------|----------------------------|------------------------------|----------------------|-----------------------|----------------|
| Training (427)   | BPT | N/A (6)      | 63.8                       | 3.8                          | 0                    | 12.2                  | N/A            |
|                  | PCa | 1 (143)      | 61.5                       | 8.4                          | 2.5                  | 12.2                  | 4.9            |
|                  |     | 2 (118)      | 63.0                       | 7.2                          | 4.5                  | 11.5                  | 15.0           |
|                  |     | 3 (45)       | 65.3                       | 8.7                          | 4.7                  | 11.6                  | 19.0           |
|                  |     | 4 (53)       | 68.8                       | 8.7                          | 5.3                  | 11.4                  | 26.4           |
|                  |     | 5 (62)       | 65.4                       | 16.7                         | 7.4                  | 10.7                  | 46.6           |
| Validation (162) | PCa | 1 (76)       | 61.9                       | 6.4                          | 2.5                  | 11.7                  | 3.8            |
|                  |     | 2 (40)       | 64.5                       | 12.2                         | 4.2                  | 11.7                  | 13.7           |
|                  |     | 3 (9)        | 61.2                       | 17.9                         | 5.1                  | 10.7                  | 18.1           |
|                  |     | 4 (19)       | 65.4                       | 39.4                         | 3.8                  | 10.6                  | 20.4           |
|                  |     | 5 (18)       | 66.9                       | 24.9                         | 6.1                  | 10.7                  | 33.5           |

GGG: Gleason Grade Group, N/A: not applicable, Pos.: positive, TCV: total cancer volume.

**eTable 2.** Cross Tabulation: AI vs Training Pathologist Grading Using AI-Assisted Method

|          |       | Pathologist 1 |       |       |       |       | Total |
|----------|-------|---------------|-------|-------|-------|-------|-------|
|          |       | GGG 1         | GGG 2 | GGG 3 | GGG 4 | GGG 5 |       |
| Software | GGG 1 | 36            | 5     | 0     | 0     | 0     | 41    |
|          | GGG 2 | 0             | 63    | 0     | 0     | 0     | 63    |
|          | GGG 3 | 0             | 0     | 15    | 1     | 0     | 16    |
|          | GGG 4 | 0             | 0     | 0     | 11    | 0     | 11    |
|          | GGG 5 | 0             | 0     | 0     | 0     | 31    | 31    |
| Total    |       | 36            | 68    | 15    | 12    | 31    | 162   |

GGG: Gleason Grade Group, Pathologist 1: Training pathologist

**eTable 3.** Cross Tabulation: Degree of Consensus Grading Using Manual and AI-Assisted Methods

|             |                    | AI-Consensus       |                    | Total<br>N (%) |
|-------------|--------------------|--------------------|--------------------|----------------|
|             |                    | 2 Viewers<br>N (%) | 3 Viewers<br>N (%) |                |
| M-Consensus | None<br>n (%)      | 1 (0.6)            | 4 (2.5)            | 5 (3.1)        |
|             | 2 Viewers<br>n (%) | 13 (8.0)           | 35 (21.6)          | 48 (29.6)      |
|             | 3 Viewers<br>n (%) | 18 (11.1)          | 91 (56.2)          | 109 (67.3)     |
| Total N (%) |                    | 32 (19.8)          | 130 (80.2)         | 162            |

Consensus: grading agreed by at least 2 of the 3 pathologists; M-consensus, consensus by manual method; AI-consensus, consensus by AI-assisted method. P<0.01 by Chi-square test for 100% consensus (green colored cells) among the 3 pathologists between the two methods.

**eFigure.** Model Architecture of AI-Powered Platform

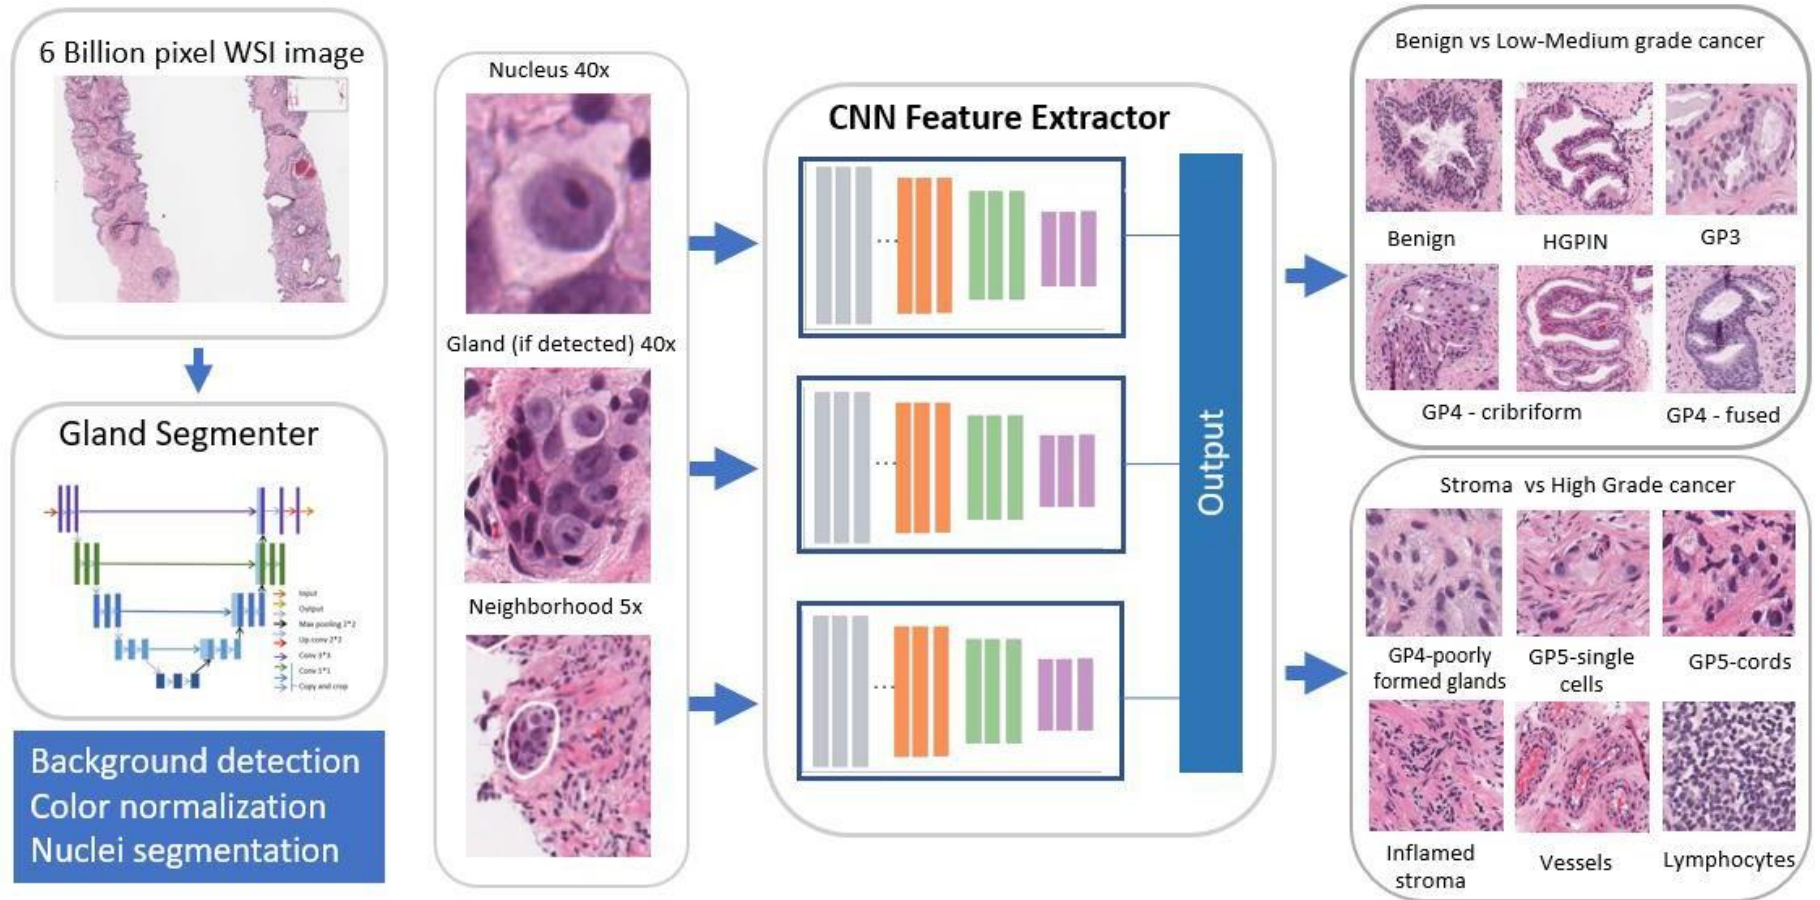

Using multiple patch sizes at 5x to 40x resolution, multi-scale model captures nuclear detail, glandular and stroma context.
